# Supplementary material for: Invasions of gladiolus rust in North America are caused by a widely-distributed clone of Uromycestransversalis
Source: PeerJ. 2019 Nov 28;7:e7986. doi: 10.7717/peerj.7986 (PMC6885349; doi:10.7717/peerj.7986)
Supplement: Table S1 [file peerj-07-7986-s001.xlsx]

## Sheet: Sheet3
Supplemental Table S1. Results from multiplex PCR reactions
		mp1	mp1	mp1	mp1	mp2	mp2	mp2	mp2
		FAM (Ut3161)	NED (Ut513)	VIC (Ut2648)	PET (UtCA759)	NED (Ut1841)	VIC (Ut2048)	PET (Ut1908)	FAM (Ut497)
Isolate ID	country
CA11-1	USA	192/195*	200/203	266/269	296	345/348	182/185	200/203	232/251
CA14-1	USA	192/195	200/203	266/269	296	345/348	182/185	200/203	232/251
CA14-2	USA	192/195	200/203	266/269	296	345/348	182/185	200/203	232/251
CA14-3	USA	192/195	200/203	266/269	296	345/348	182/185	200/203	232/251
CA14-4	USA	192/195	200/203	266/269	296	345/348	182/185	200/203	232/251
CA14-5	USA	192/195	200/203	266/269	296	345/348	182/185	200/203	232/251
CA14-6	USA	192/195	200/203	266/269	296	345/348	182/185	200/203	NO FRAGMENTS***
CA14-7	USA	189/192**	197/200	263/266	NO FRAGMENTS	NO FRAGMENTS	NO FRAGMENTS	NO FRAGMENTS	NO FRAGMENTS
FL11-1	USA	192/195	200/203	266/269	296	345/348	182/185	200/203	NO FRAGMENTS
FL11-2	USA	192/195	200/203	266/269	296	345/348	182/185	200/203	232/251
CR497224	Costa Rica	192/195	200/203	266/269	296	345/348	182/185	200/203	232/251
CR498594	Costa Rica	192/195	200/203	266/269	296	345/348	182/185	200/203	232/251
CR498400	Costa Rica	192/195	200/203	266/269	296	345/348	182/185	200/203	232/251
CR497666	Costa Rica	192/195	200/203	266/269	296	345/348	182/185	200/203	232/251
CR498457	Costa Rica	192/195	200/203	266/269	296	345/348	182/185	200/203	232/251
NZ69208	New Zealand	192/195	NO FRAGMENTS	NO FRAGMENTS	NO FRAGMENTS	345/348	NO FRAGMENTS	200/203	232/251
NZ71109	New Zealand	192/195	200/203	NO FRAGMENTS	NO FRAGMENTS	NO FRAGMENTS	NO FRAGMENTS	200/203	232
NZ99990	New Zealand	192/195	200/203	266/269	296	345/348	182/185	200/203	232/251
NZ69483	New Zealand	192/195	200/203	266	296	348	NO FRAGMENTS	200/203	232/251
NZ87970	New Zealand	189/192	NO FRAGMENTS	180	NO FRAGMENTS	NO FRAGMENTS	NO FRAGMENTS	200	NO FRAGMENTS
NZ71696	New Zealand	192/195	200/203	266/269	296	345/348	182/185	200/203	232/251
NZ97335	New Zealand	192/195	200/203	266/269	296	345	182/185	200/203	232/251
NZ69482	New Zealand	195/198	203/206	269/272	NO FRAGMENTS	348	NO FRAGMENTS	NO FRAGMENTS	NO FRAGMENTS
NZ88195	New Zealand	192/195	200/203	269	296	348	NO FRAGMENTS	NO FRAGMENTS	NO FRAGMENTS
NZ69481	New Zealand	192/195	200/203	NO FRAGMENTS	296	NO FRAGMENTS	182/185	NO FRAGMENTS	NO FRAGMENTS
VPRI 32661	Australia	192/195	200/203	NO FRAGMENTS	NO FRAGMENTS	NO FRAGMENTS	NO FRAGMENTS	NO FRAGMENTS	NO FRAGMENTS
VPRI 21344	Australia	192/195	200/203	266/269	296	NO FRAGMENTS	182/185	200/203	251
VPRI 21238	Australia	192/195	200/203	266/269	296	NO FRAGMENTS	NO FRAGMENTS	200/203	NO FRAGMENTS
VPRI 22299	Australia	192/195	200/203	NO FRAGMENTS	296	NO FRAGMENTS	NO FRAGMENTS	NO FRAGMENTS	NO FRAGMENTS
VPRI 20858	Australia	192/195	200/203	266/269	296	345/348	182/185	200/203	251
VPRI 20881	Australia	192/195	200/203	266/269	296	NO FRAGMENTS	182/185	200/203	251
VPRI 20841	Australia	192/195	NO FRAGMENTS	NO FRAGMENTS	NO FRAGMENTS	NO FRAGMENTS	NO FRAGMENTS	NO FRAGMENTS	NO FRAGMENTS
TLAP1	Mexico	192/195	200/203	266/269	296	345	182/185	200/203	251
TLAP2	Mexico	192/195	200/203	266/269	296	345/348	182/185	200/203	232/251
TLAP3	Mexico	192/195	200/203	266/269	296	345/348	182/185	200/203	251
Atlix1	Mexico	192/195	200/203	266/269	296	NO FRAGMENTS	NO FRAGMENTS	NO FRAGMENTS	NO FRAGMENTS
Atlix2	Mexico	192/195	200/203	266/269	296	345/348	182/185	200/203	232/251
Atlix3	Mexico	192/195	200/203	266/269	296	345/348	182/185	200/203	232/251
Cua1	Mexico	192/195	200/203	266/269	296	NO FRAGMENTS	NO FRAGMENTS	200/203	NO FRAGMENTS
Cua2	Mexico	192/195	200/203	266/269	296	345	182/185	200/203	251
Cua3	Mexico	192/195	200/203	266/269	296	345/348	182/185	200/203	232/251
Gro1	Mexico	192/195	200/203	266/269	296	345/348	182/185	200/203	251
Gro2	Mexico	192/195	200/203	266/269	296	345/348	182/185	200/203	251
Gro3	Mexico	192/195	200/203	266/269	296	345/348	182/185	200/203	251
Ten1	Mexico	192/195	200/203	266/269	296	345/348	182/185	200/203	251
Ten2	Mexico	192/195	200/203	266/269	296	345/348	182/185	200/203	232/251
Ten3	Mexico	192/195	200/203	266/269	296	345/348	182/185	200/203	NO FRAGMENTS
Iri1	Mexico	192/195	200/203	266/269	296	345/348	182	200/203	NO FRAGMENTS
Iri2	Mexico	192/195	200/203	266/269	296	345/348	182/185	200/203	232/251
LF1 1	Mexico	192/195	200/203	266/269	296	345/348	182/185	200/203	232/251
LF1 2	Mexico	192/195	200/203	266/269	296	345/348	182/185	200/203	NO FRAGMENTS
LF1 3	Mexico	192/195	200/203	266/269	296	NO FRAGMENTS	182/185	200/203	NO FRAGMENTS
LF2 1	Mexico	192/195	200/203	266/269	296	345/348	182/185	200/203	NO FRAGMENTS
LF2 2	Mexico	NO FRAGMENTS	200/203	NO FRAGMENTS	NO FRAGMENTS	NO FRAGMENTS	182/185	NO FRAGMENTS	NO FRAGMENTS
LF2 3	Mexico	192/195	200/203	266/269	296	345/348	182/185	200/203	NO FRAGMENTS
M1 R1	Mexico	192/195	200/203	266/269	296	345/348	182/185	200/203	232/251
M1 R2	Mexico	192/195	200/203	266/269	296	345/348	182/185	200/203	232/251
M1 R3	Mexico	192/195	200/203	266/269	296	345/348	182/185	200/203	232/251
M2 R1	Mexico	192/195	200/203	266/269	296	345/348	182/185	200/203	232/251
M2 R2	Mexico	192/195	200/203	266/269	296	345/348	182/185	200/203	251
M2 R3	Mexico	192/195	200/203	266/269	296	345/348	182/185	200/203	NO FRAGMENTS
M3 R1	Mexico	192/195	200/203	266/269	296	345/348	182/185	200/203	251
M3 R2	Mexico	192/195	200/203	266/269	296	345/348	182/185	200/203	232/251
M3 R3	Mexico	192/195	200/203	266/269	296	345/348	182/185	200/203	232/251
M4 1	Mexico	192/195	200/203	266/269	296	345/348	182/185	200/203	232/251
M4 2	Mexico	192/195	200/203	266/269	296	345/348	182/185	200/203	232/251
M5 R1	Mexico	192/195	200/203	266/269	296	345/348	182/185	200/203	232/251
M5 R2	Mexico	192/195	200/203	266/269	296	345/348	182/185	200/203	232/251
M5 R3	Mexico	192/195	200/203	266/269	296	345/348	182/185	200/203	232/251
M6 R1	Mexico	192/195	200/203	266/269	296	345/348	182/185	200/203	232/251
M6 R2	Mexico	192/195	200/203	266/269	296	345/348	182/185	200/203	232/251
M6 R3	Mexico	192/195	200/203	266/269	296	345/348	182/185	200/203	232/251
M7 1	Mexico	192/195	200/203	266/269	296	345/348	182/185	200/203	251
M7 2	Mexico	192/195	200/203	266/269	296	345/348	182/185	200/203	232/251
M7 3	Mexico	192/195	200/203	266/269	296	345/348	182/185	200/203	232/251
M8 R1	Mexico	192/195	200/203	266/269	296	345/348	182/185	200/203	232/251
M8 R2	Mexico	192/195	200/203	266/269	296	345/348	182/185	200/203	232/251
M8 R3	Mexico	192/195	200/203	266/269	296	345/348	182/185	200/203	232/251
M9 R1	Mexico	192/195	200/203	266/269	296	345/348	182/185	200/203	232/251
M9 R2	Mexico	192/195	200/203	266/269	296	345/348	182/185	200/203	232/251
M9 R3	Mexico	192/195	200/203	266/269	296	345/348	182/185	200/203	232/251
M10 R1	Mexico	192/195	200/203	266/269	296	345/348	182/185	200/203	251
M10 R2	Mexico	192/195	200/203	266/269	296	345/348	182/185	200/203	232/251
M10 R3	Mexico	192/195	200/203	266/269	296	345/348	182/185	200/203	232/251
JB1	Mexico	192/195	200/203	266/269	296	345/348	182/185	200/203	232/251
JB2	Mexico	192/195	200/203	266/269	296	345/348	182/185	200/203	232/251
JB3	Mexico	192/195	200/203	266/269	296	NO FRAGMENTS	NO FRAGMENTS	NO FRAGMENTS	NO FRAGMENTS
JB4	Mexico	192/195	200/203	266/269	296	345/348	182/185	200/203	232/251
JB5	Mexico	192/195	200/203	266/269	296	345/348	182/185	200/203	232/251
JB6	Mexico	192/195	200/203	266/269	296	345/348	182/185	200/203	232/251
JB7	Mexico	192/195	200/203	266/269	296	345/348	182/185	200/203	232/251
JB8	Mexico	192/195	200/203	266/269	296	345/348	182/185	200/203	251
*The numbers for each locus represent the allele sizes of the observed fragments
**yell ow boxes indicate fragments with peaks below the cuttoff relative intensity of 500 RFU (relative fluorescence units).
***pink boxes with the words "NO FRAGMENTS" indicate that no fragments were observed on the chromatograms in the expected size range for that locus
